# Supplementary material
Source: MDPI journal article supplement (https://www.mdpi.com/1999-4907/6/6/1810)
Supplement: s1 [file s1]

## Supplementary 1: Questionnaires structure and methods for the calculation of results (by section)

### Section 1—General Description of the Area

Official name of the Park  
 Name of the Management Authority  
 Location (Municipalities, Provinces, and Regions included)  
 Total area (hectares)  
 Total forest area (hectares)  
 Area not under forest management (hectares)  
 Main Forest Categories  
 Contact details

### Section 2—Forest Ecosystem Services Relevance

This section is aimed at assessing FES relevance in the area. The assessment is carried out by assigning a ranking value to each specific service Class, according to the framework proposed by CICES V4.3 ([1]). For the purposes of this research, correspondences between CICES V4.3 Classes and FES Types have been created. Ranking values vary as follows: 0 (not important), 1 (less important), 2 (averagely important), 3 (very important), 4 (primary, fundamental). While ranking the FES classes, only forest ecosystems have to be considered (with the exception of cultural/aesthetic services, which may be considered at a broader scale).

**Table S1.** Forest ecosystem service (FES) relevance for FES type and CICES class.

| CICES V4.3 Framework       |                                                          |                                                         | Related FES                                                                            |                                                                       | FES Relevance |
|----------------------------|----------------------------------------------------------|---------------------------------------------------------|----------------------------------------------------------------------------------------|-----------------------------------------------------------------------|---------------|
| Section                    | Division                                                 | Group                                                   | Class                                                                                  | FES Type                                                              |               |
| Provisioning               | Nutrition                                                | Biomass                                                 | Wild plants, algae and their outputs                                                   | Non-wood forest products availability                                 |               |
|                            |                                                          | Water                                                   | Surface water for drinking                                                             | Fresh water availability                                              |               |
|                            |                                                          |                                                         | Ground water for drinking                                                              |                                                                       |               |
|                            | Materials                                                | Biomass                                                 | Fibres and other materials from plants, algae and animals for direct use or processing | Wood mobilization and timber extraction (production of raw materials) |               |
|                            |                                                          | Biomass-based energy sources                            | Plant-based resources                                                                  | Wood mobilization and timber extraction (for energy supply)           |               |
|                            | Mediation of waste, toxics and other nuisances           | Mediation by biota                                      | Bio-remediation by micro-organisms, algae, plants, and animals                         | Bioremediation                                                        |               |
| Regulation and Maintenance | Mediation of flows                                       | Mass flows                                              | Mass stabilisation and control of erosion rates                                        | Hydrogeological protection                                            |               |
|                            |                                                          |                                                         | Buffering and attenuation of mass flows                                                |                                                                       |               |
|                            |                                                          | Liquid flows                                            | Hydrological cycle and water flow maintenance                                          |                                                                       |               |
|                            | Maintenance of physical, chemical, biological conditions |                                                         | Flood protection                                                                       |                                                                       |               |
|                            |                                                          | Lifecycle maintenance, habitat and gene pool protection | Pollination and seed dispersal                                                         | Biodiversity conservation                                             |               |
|                            |                                                          | Atmospheric composition and climate regulation          | Maintaining nursery populations and habitats                                           |                                                                       |               |
|                            |                                                          |                                                         | Global climate regulation by reduction of greenhouse gas concentrations                | Climate change mitigation                                             |               |
|                            |                                                          |                                                         | Micro and regional climate regulation                                                  |                                                                       |               |

Table S1. Cont.

| CICES V4.3 Framework |                                                                                        |                                              | Related FES                                                                                 |                                                | FES       |
|----------------------|----------------------------------------------------------------------------------------|----------------------------------------------|---------------------------------------------------------------------------------------------|------------------------------------------------|-----------|
| Section              | Division                                                                               | Group                                        | Class                                                                                       | FES Type                                       | Relevance |
| Cultural             | Physical and intellectual interactions with biota, ecosystems, and land-/seascapes     | Physical and experiential interactions       | Experiential use of plants, animals and land-/seascapes in different environmental settings | Improvement of tourism and recreation concerns |           |
|                      |                                                                                        |                                              | Physical use of land-/seascapes in different environmental settings                         |                                                |           |
|                      |                                                                                        |                                              | Scientific                                                                                  |                                                |           |
|                      |                                                                                        | Intellectual and representative interactions | Educational                                                                                 |                                                |           |
|                      |                                                                                        |                                              | Heritage, cultural                                                                          |                                                |           |
|                      |                                                                                        |                                              | Entertainment                                                                               |                                                |           |
|                      | Spiritual, symbolic and other interactions with biota, ecosystems, and land-/seascapes | Spiritual and/or emblematic                  | Aesthetic                                                                                   |                                                |           |
|                      |                                                                                        |                                              | Symbolic                                                                                    | Conservation of the landscape identity         |           |
|                      |                                                                                        | Other cultural outputs                       | Sacred and/or religious                                                                     |                                                |           |
|                      |                                                                                        |                                              | Existence                                                                                   |                                                |           |
|                      |                                                                                        |                                              | Bequest                                                                                     |                                                |           |

Table S2. Results of the two-sample *t* test on FES relevance.

|                                                                      | Non-Wood Forest Products Availability, Fresh Water Availability | Wood Mobilization and Timber Extraction (Production of Raw Material) | Wood Mobilization and Timber Extraction (for Energy Supply) | Bioremediation | Hydrogeological Protection (or against Other Natural Extreme Events) | Biodiversity Conservation, Climate Change Mitigation | Improvement of Tourism and Recreation Concerns | Conservation of the Landscape Identity |
|----------------------------------------------------------------------|-----------------------------------------------------------------|----------------------------------------------------------------------|-------------------------------------------------------------|----------------|----------------------------------------------------------------------|------------------------------------------------------|------------------------------------------------|----------------------------------------|
| Non-wood forest products availability, fresh water availability      |                                                                 | 0.236                                                                | 0.846                                                       | 1              | 0.086                                                                | 0.133                                                | 0.002 ***                                      | 0.574                                  |
| Wood mobilization and timber extraction (production of raw material) |                                                                 |                                                                      | 0.267                                                       | 0.291          | 0.001 ***                                                            | 0.004 ***                                            | <0.001 ***                                     | 0.062                                  |
| Wood mobilization and timber extraction (for energy supply)          |                                                                 |                                                                      |                                                             | 0.862          | 0.029                                                                | 0.064                                                | <0.001 ***                                     | 0.41                                   |
| Bioremediation                                                       |                                                                 |                                                                      |                                                             |                | 0.133                                                                | 0.176                                                | 0.005 ***                                      | 0.612                                  |
| Hydrogeological protection (or against other natural extreme events) |                                                                 |                                                                      |                                                             |                |                                                                      | 1                                                    | 0.019 **                                       | 0.236                                  |
| Biodiversity conservation, climate change mitigation                 |                                                                 |                                                                      |                                                             |                |                                                                      |                                                      | 0.062                                          | 0.311                                  |
| Improvement of tourism and recreation concerns                       |                                                                 |                                                                      |                                                             |                |                                                                      |                                                      |                                                | 0.005 ***                              |
| Conservation of the landscape identity                               |                                                                 |                                                                      |                                                             |                |                                                                      |                                                      |                                                |                                        |

\*\*  $p < 0.05$ ; \*\*\*  $p < 0.01$ .

### Section 3—Relationship between Local Stakeholders and Forest Ecosystem Services

This section is aimed at assessing how much local stakeholders (grouped by typology) currently influence the FES provision in the area. In a cross-table, several stakeholders are compared with each service Division (see CICES V4.3, [cices.eu/](http://cices.eu/)). The assessment is carried out per each stakeholder/Division cross-section by assigning one of the following symbols: +1 (if the stakeholder is considered as a driver improving the related-service provision), −1 (if the stakeholder is considered as a barrier limiting the related-service provision), or 0 (if the stakeholder has no direct influence on the related-service provision).

**Table S3.** Cross relationship between stakeholder typologies (on rows) and CICES divisions (on columns).

| Stakeholder Typology | Ecosystem Services Division Code                                                | Nutrition | Materials | Energy | Mediation of Waste, Toxics and other Nuisances | Mediation of Flows | Maintenance of Physical, Chemical, Biological Conditions | Physical and Intellectual Interactions with Biota, Ecosystems, and Land-/Seascapes | Spiritual, Symbolic and other Interactions with Biota, Ecosystems, and Land-/Seascapes |
|----------------------|---------------------------------------------------------------------------------|-----------|-----------|--------|------------------------------------------------|--------------------|----------------------------------------------------------|------------------------------------------------------------------------------------|----------------------------------------------------------------------------------------|
|                      |                                                                                 | A         | B         | C      | D                                              | E                  | F                                                        | G                                                                                  | H                                                                                      |
| Nature conservation  | Non-governmental organizations                                                  |           |           |        |                                                |                    |                                                          |                                                                                    |                                                                                        |
|                      | Protected area officials                                                        |           |           |        |                                                |                    |                                                          |                                                                                    |                                                                                        |
|                      | European Union (e.g., NATURA2000 Network sites)                                 |           |           |        |                                                |                    |                                                          |                                                                                    |                                                                                        |
|                      | State managed national parks (for national environmental and cultural heritage) |           |           |        |                                                |                    |                                                          |                                                                                    |                                                                                        |
|                      |                                                                                 |           |           |        |                                                |                    |                                                          |                                                                                    |                                                                                        |
| Agriculture          | Large-scale farming                                                             |           |           |        |                                                |                    |                                                          |                                                                                    |                                                                                        |
|                      | Pastoralism (e.g., sheep, reindeer)                                             |           |           |        |                                                |                    |                                                          |                                                                                    |                                                                                        |
|                      | Small-scale farming                                                             |           |           |        |                                                |                    |                                                          |                                                                                    |                                                                                        |
| Tourism sector       | Skiing resort businesses and workers                                            |           |           |        |                                                |                    |                                                          |                                                                                    |                                                                                        |
|                      | Nature-based tourism entrepreneurs                                              |           |           |        |                                                |                    |                                                          |                                                                                    |                                                                                        |
|                      | Rural tourism entrepreneurs (e.g., small scale bed and breakfast)               |           |           |        |                                                |                    |                                                          |                                                                                    |                                                                                        |
|                      | National and international tour operators                                       |           |           |        |                                                |                    |                                                          |                                                                                    |                                                                                        |
|                      |                                                                                 |           |           |        |                                                |                    |                                                          |                                                                                    |                                                                                        |
| Forestry sector      | State forestry institutions                                                     |           |           |        |                                                |                    |                                                          |                                                                                    |                                                                                        |
|                      | Small-scale private forest owners                                               |           |           |        |                                                |                    |                                                          |                                                                                    |                                                                                        |
|                      | Private forest companies (industrial forestry corporations)                     |           |           |        |                                                |                    |                                                          |                                                                                    |                                                                                        |

Table S3. Cont.

|                           |                                                                                                                       | Nutrition | Materials | Energy | Mediation of<br>Waste,<br>Toxics and<br>other<br>Nuisances | Mediation<br>of Flows | Maintenance of<br>Physical,<br>Chemical,<br>Biological<br>Conditions | Physical and<br>Intellectual<br>Interactions with<br>Biota,<br>Ecosystems, and<br>Land-/Seascapes | Spiritual,<br>Symbolic and<br>other Interactions<br>with Biota,<br>Ecosystems, and<br>Land-/Seascapes |
|---------------------------|-----------------------------------------------------------------------------------------------------------------------|-----------|-----------|--------|------------------------------------------------------------|-----------------------|----------------------------------------------------------------------|---------------------------------------------------------------------------------------------------|-------------------------------------------------------------------------------------------------------|
| Stakeholder<br>Typology   | Ecosystem Services<br>Division Code                                                                                   | A         | B         | C      | D                                                          | E                     | F                                                                    | G                                                                                                 | H                                                                                                     |
| Recreation<br>activities  | Hunters                                                                                                               |           |           |        |                                                            |                       |                                                                      |                                                                                                   |                                                                                                       |
|                           | Mushroom, berry or<br>other non-wood<br>products pickers                                                              |           |           |        |                                                            |                       |                                                                      |                                                                                                   |                                                                                                       |
|                           | Recreationists<br>(outdoor activities<br>such as mountain<br>bike cycling)                                            |           |           |        |                                                            |                       |                                                                      |                                                                                                   |                                                                                                       |
|                           | Skiers (general)                                                                                                      |           |           |        |                                                            |                       |                                                                      |                                                                                                   |                                                                                                       |
|                           | Users of snow<br>mobiles, all-terrain<br>vehicles, or other<br>motorized ways to<br>access and enjoy<br>treeline area |           |           |        |                                                            |                       |                                                                      |                                                                                                   |                                                                                                       |
|                           |                                                                                                                       |           |           |        |                                                            |                       |                                                                      |                                                                                                   |                                                                                                       |
| Education and<br>research | Researchers,<br>technicians and<br>scientists (e.g.,<br>having study areas<br>and sampling sites<br>in the area)      |           |           |        |                                                            |                       |                                                                      |                                                                                                   |                                                                                                       |
|                           | Schools or other<br>groups of people<br>doing educational<br>trips to the area                                        |           |           |        |                                                            |                       |                                                                      |                                                                                                   |                                                                                                       |
| Public<br>Institutions    | Army (strategic<br>purposes and<br>national security)                                                                 |           |           |        |                                                            |                       |                                                                      |                                                                                                   |                                                                                                       |
| Users and<br>consumers    | Residents using<br>fresh water for<br>drinking                                                                        |           |           |        |                                                            |                       |                                                                      |                                                                                                   |                                                                                                       |
|                           | Local farmers using<br>water for agriculture<br>purposes                                                              |           |           |        |                                                            |                       |                                                                      |                                                                                                   |                                                                                                       |
| Local<br>inhabitants      | Permanent residents                                                                                                   |           |           |        |                                                            |                       |                                                                      |                                                                                                   |                                                                                                       |
|                           | Second home<br>residents                                                                                              |           |           |        |                                                            |                       |                                                                      |                                                                                                   |                                                                                                       |
|                           | Land owners                                                                                                           |           |           |        |                                                            |                       |                                                                      |                                                                                                   |                                                                                                       |
| Manufacturing<br>sector   | Mining companies                                                                                                      |           |           |        |                                                            |                       |                                                                      |                                                                                                   |                                                                                                       |
|                           | Green-power<br>companies (wind,<br>water, etc.)                                                                       |           |           |        |                                                            |                       |                                                                      |                                                                                                   |                                                                                                       |

#### Section 4—Governance Instruments at Work in the Area

This section aims at identify what are the governance instruments currently at work in the broader area (*i.e.*, in and outside the Park boundaries). Answers are in the TRUE/FALSE form.

**Table S4.** List of governance instruments at different governance scales to be assessed in terms of their current implementation.

| Governance Scale           | Governance Instrument                                             | Currently at Work |
|----------------------------|-------------------------------------------------------------------|-------------------|
| Large-scale urban planning | (Strategic) Regional and sub-regional land-use plan               |                   |
|                            | Main Regulatory Plan                                              |                   |
|                            | Plan for productive settlements (Municipalities land use plan)    |                   |
| Forest sector planning     | Management and Conservation Plan (Protected Area management plan) |                   |
|                            | Regional Forest Plan                                              |                   |
|                            | Watershed Plan                                                    |                   |
|                            | Forest Landscape Management Plan                                  |                   |
|                            | Regional Forest Law                                               |                   |
|                            | EU regulatory frameworks (CAP, NATURA2000 Network, <i>etc.</i> )  |                   |
|                            | National Strategies and Forest Action Plans                       |                   |
| Market-based governance    | Eco-labels for local agriculture products (tourism purposes)      |                   |

#### Section 5—Factors Considered in Decision-Making Processes

In this section, a list of sentences on how different factors (e.g., local stakeholders involvement, FES assessment, trans-disciplinarity, *etc.*) have an active influence (or are considered) within decision-making processes for forest management in the Park is provided. Answers are in the TRUE/PARTIALLY TRUE/FALSE form.

**Table S5.** List of sentences about several factors influencing decision-making processes for forest management in the Park.

|                                                                                                                                                                                                 |
|-------------------------------------------------------------------------------------------------------------------------------------------------------------------------------------------------|
| The relevant stakeholders have the possibility to participate in the decision-making processes                                                                                                  |
| The stakeholders can participate in land use planning processes with a confidence that their view is properly taken into account                                                                |
| Governance instruments work in balanced combination of bottom-up and top-down practices                                                                                                         |
| Governance instruments are transparent and include a continuous knowledge transfer between stakeholders, Park managers, and Public Bodies and Institutions                                      |
| There are disagreements and disapprovals about currently implemented forest management practices among citizens                                                                                 |
| Local stakeholders know forest managers and how to reach them in cases of direct involvement in decision-making processes                                                                       |
| The decision-making processes in forest governance frequently use technological and scientific progresses currently available both at national and international level                          |
| European and national conservation guidelines in forest governance are actually taken into account during decision-making processes, as well as they are implemented in forest management plans |
| The ecologic and economic evaluations of Forest ecosystem services are currently considered during decision-making processes                                                                    |
| Current forest management derives from the analysis of ecosystem service trade-offs                                                                                                             |

### Section 6—Decision-Making Processes and Research Activities

In this section, a list of sentences about the role of science and research in decision-making processes for forest management in the Park is provided. Answers are in the TRUE/PARTIALLY TRUE/FALSE form.

**Table S6.** List of sentences about the linkages between research activities and decision-making processes for forest management in the Park.

|                                                                                                                                                                                                                       |
|-----------------------------------------------------------------------------------------------------------------------------------------------------------------------------------------------------------------------|
| Researchers and scientists from different fields (e.g., environmental sciences) are supported by the Management Authority of the Park during their activities within the area                                         |
| The Management Authority has well-established contacts with Public or private Research Institutions at least at national level                                                                                        |
| Research projects include continuous two-way knowledge exchange between researchers and stakeholders (e.g., local stakeholders, decision makers)                                                                      |
| Research results/outcomes (and advances) are conceived by the Management Authority of the Park as fundamental in supporting and completing the traditional knowledge and techniques in forest management and planning |
| The Management Authority of the Park actively participate in Research project at national or European level                                                                                                           |

### Section 7—Forest Ecosystem Services Relevance in Forest Management

In this section, a test is carried out in order to assess the relevance of FES while preparing a Forest Management Plan for the next 30 years in the Park area. The following three are the assessment elements: (i) priority in forest management; (ii) difficulty in valuing/quantifying the service; (iii) relevance for local communities in terms of expected benefits. The first elements is assessed by using ranking values from 0 (low priority) to 5 (high priority). The second element is assessed by using ranking values from 0 (low difficulty) to 5 (high difficulty). The third element is assessed by using ranking values from 0 (low relevance) to 5 (high relevance). In case of a recently implemented Forest Management Plan, ranking values are properly derived from it.

**Table S7.** FES-forest management relationship, in terms of priority for forest management guide-lines, difficulty in assessing the service, and relevance for local communities.

| Forest Ecosystem Service (FES)                                                          | Priority in Forest Management | Difficulty in Valuing/Quantifying the Service | Relevance for Local Communities in Terms of Expected Benefits |
|-----------------------------------------------------------------------------------------|-------------------------------|-----------------------------------------------|---------------------------------------------------------------|
| Wood mobilisation and timber extraction                                                 |                               |                                               |                                                               |
| Non-wood forest products availability                                                   |                               |                                               |                                                               |
| Fresh water availability                                                                |                               |                                               |                                                               |
| Hydrogeological protection (or against other natural extreme events)                    |                               |                                               |                                                               |
| Biodiversity conservation (habitat integrity and diversity, genepools protection, etc.) |                               |                                               |                                                               |
| Climate change mitigation                                                               |                               |                                               |                                                               |
| Bioremediation                                                                          |                               |                                               |                                                               |
| Conservation of the landscape identity (cultural, spiritual, and aesthetic)             |                               |                                               |                                                               |
| Improvement of tourism and recreation concerns                                          |                               |                                               |                                                               |

**Table S8.** Results of the two-sample *t* test on “priority in forest management guide-lines”.

|                                                      | Wood<br>Mobilization<br>and Timber<br>Extraction | Non-Wood<br>Forest<br>Products<br>Availability | Fresh Water<br>Availability | Hydrogeological<br>Protection | Biodiversity<br>Conservation | Climate<br>Change<br>Mitigation | Bioremediation | Preservation<br>of Landscape<br>Identity | Improvement<br>of Tourism<br>and Recreation<br>Concerns |
|------------------------------------------------------|--------------------------------------------------|------------------------------------------------|-----------------------------|-------------------------------|------------------------------|---------------------------------|----------------|------------------------------------------|---------------------------------------------------------|
| Wood mobilization<br>and timber extraction           |                                                  | 0.177                                          | 0.267                       | 0.003 ***                     | <0.001 ***                   | 0.374                           | 0.218          | 0.059                                    | 0.050                                                   |
| Non-wood forest<br>products availability             |                                                  |                                                | 0.018 **                    | <0.001 ***                    | <0.001 ***                   | 0.029 **                        | 1.000          | 0.001 ***                                | <0.001 ***                                              |
| Fresh water<br>availability                          |                                                  |                                                |                             | 0.105                         | 0.008 ***                    | 0.805                           | 0.029 **       | 0.567                                    | 0.136                                                   |
| Hydrogeological<br>protection                        |                                                  |                                                |                             |                               | 0.070                        | 0.050                           | <0.001 ***     | 0.156                                    | 0.812                                                   |
| Biodiversity<br>conservation                         |                                                  |                                                |                             |                               |                              | 0.003 ***                       | <0.001 ***     | 0.030 **                                 | 0.036 ***                                               |
| Climate change<br>mitigation                         |                                                  |                                                |                             |                               |                              |                                 | 0.044 **       | 0.377                                    | 0.067                                                   |
| Bioremediation                                       |                                                  |                                                |                             |                               |                              |                                 |                | 0.003 ***                                | <0.001 ***                                              |
| Preservation of<br>landscape identity                |                                                  |                                                |                             |                               |                              |                                 |                |                                          | 0.215                                                   |
| Improvement of<br>tourism and<br>recreation concerns |                                                  |                                                |                             |                               |                              |                                 |                |                                          |                                                         |

\*\*  $p < 0.05$ ; \*\*\*  $p < 0.01$ .

**Table S9.** Results of the two-sample  $t$  test on “difficulty in valuing/quantifying the service”.

|                                                   | Wood Mobilization and<br>Timber Extraction | Non-Wood Forest<br>Products Availability | Fresh Water<br>Availability | Hydrogeological<br>Protection | Biodiversity<br>Conservation | Climate Change<br>Mitigation | Bioremed<br>iation | Preservation of<br>Landscape Identity | Improvement of Tourism and<br>Recreation Concerns |
|---------------------------------------------------|--------------------------------------------|------------------------------------------|-----------------------------|-------------------------------|------------------------------|------------------------------|--------------------|---------------------------------------|---------------------------------------------------|
| Wood mobilization and timber<br>extraction        |                                            | 0.129                                    | 0.895                       | 0.426                         | 0.386                        | 0.283                        | 0.204              | 0.078                                 | 0.145                                             |
| Non-wood forest products<br>availability          |                                            |                                          | 0.199                       | 0.473                         | 0.57                         | 0.627                        | 0.914              | 0.901                                 | 0.793                                             |
| Fresh water availability                          |                                            |                                          |                             | 0.544                         | 0.492                        | 0.391                        | 0.28               | 0.138                                 | 0.237                                             |
| Hydrogeological protection                        |                                            |                                          |                             |                               | 0.907                        | 0.802                        | 0.582              | 0.373                                 | 0.59                                              |
| Biodiversity conservation                         |                                            |                                          |                             |                               |                              | 0.906                        | 0.674              | 0.471                                 | 0.705                                             |
| Climate change mitigation                         |                                            |                                          |                             |                               |                              |                              | 0.674              | 0.516                                 | 0.783                                             |
| Bioremediation                                    |                                            |                                          |                             |                               |                              |                              |                    | 0.82                                  | 0.905                                             |
| Preservation of landscape<br>identity             |                                            |                                          |                             |                               |                              |                              |                    |                                       | 0.67                                              |
| Improvement of tourism and<br>recreation concerns |                                            |                                          |                             |                               |                              |                              |                    |                                       |                                                   |

**Table S10.** Results of the two-sample  $t$  test on “relevance for local communities (in terms of expected benefits)”.

|                                                   | Wood Mobilization and<br>Timber Extraction | Non-Wood Forest<br>Products Availability | Fresh Water<br>Availability | Hydrogeological<br>Protection | Biodiversity<br>Conservation | Climate Change<br>Mitigation | Bioremediation | Preservation of<br>Landscape Identity | Improvement of Tourism and<br>Recreation Concerns |
|---------------------------------------------------|--------------------------------------------|------------------------------------------|-----------------------------|-------------------------------|------------------------------|------------------------------|----------------|---------------------------------------|---------------------------------------------------|
| Wood mobilization and<br>timber extraction        |                                            | 0.495                                    | 0.383                       | 0.055                         | 0.742                        | 0.006 ***                    | 0.007 ***      | 1                                     | 0.014 **                                          |
| Non-wood forest<br>products availability          |                                            |                                          | 0.157                       | 0.02 **                       | 0.666                        | 0.091                        | 0.073          | 0.495                                 | 0.006 ***                                         |
| Fresh water availability                          |                                            |                                          |                             | 0.351                         | 0.221                        | 0.001 ***                    | 0.001 ***      | 0.383                                 | 0.151                                             |
| Hydrogeological protection                        |                                            |                                          |                             |                               | 0.018 **                     | <0.001 ***                   | <0.001 ***     | 0.055                                 | 0.567                                             |
| Biodiversity conservation                         |                                            |                                          |                             |                               |                              | 0.007 ***                    | 0.009 ***      | 0.742                                 | 0.003 ***                                         |
| Climate change mitigation                         |                                            |                                          |                             |                               |                              |                              | 0.686          | 0.006 ***                             | <0.001 ***                                        |
| Bioremediation                                    |                                            |                                          |                             |                               |                              |                              |                | 0.007 ***                             | <0.001 ***                                        |
| Preservation of landscape<br>identity             |                                            |                                          |                             |                               |                              |                              |                |                                       | 0.014 **                                          |
| Improvement of tourism<br>and recreation concerns |                                            |                                          |                             |                               |                              |                              |                |                                       |                                                   |

\*\*  $p < 0.05$ ; \*\*\*  $p < 0.01$ .



## Supplementary 2

**Table S11.** List of EU-Funded Projects as Resulted by Review Section E.

| Project Acronym          | Full Project Title                                                                                                             | Start Date<br>(NA = Not Available) | End Date<br>(NA = Not Available) | Web Page<br>(NF = Not Found)                                                        | Linkage to Biodiversity<br>and Ecosystem Services<br>(Forest Ecosystems<br>Included) | Italy as Partner in the<br>Project Consortium | Italy as Coordinator of<br>the Project Consortium | Type of<br>Partnership<br>from Italy |
|--------------------------|--------------------------------------------------------------------------------------------------------------------------------|------------------------------------|----------------------------------|-------------------------------------------------------------------------------------|--------------------------------------------------------------------------------------|-----------------------------------------------|---------------------------------------------------|--------------------------------------|
| ALARM                    | Assessing LARge-scale<br>environmental Risks with<br>tested Methods                                                            | 01/02/2004                         | 31/01/2009                       | <a href="http://www.alarmproject.net/alarm/">http://www.alarmproject.net/alarm/</a> | Yes                                                                                  | YES                                           | NO                                                | Public                               |
| ALTER-NET                | A Long-term Biodiversity,<br>Ecosystem and Awareness<br>Research Network                                                       | 01/04/2004                         | 31/03/2009                       | <a href="http://www.alter-net.info/">http://www.alter-net.info/</a>                 | Partially                                                                            | YES                                           | NO                                                | Public                               |
| AMECO                    | Assisted Migration of<br>Forests as a climate change<br>economic mitigation<br>strategy                                        | 01/05/2013                         | 30/04/2015                       | NF                                                                                  | NA                                                                                   | NO                                            | NO                                                | Public                               |
| ARANGE                   | Advanced multifunctional<br>forest management in<br>European mountain ranges                                                   | 01/02/2012                         | 31/07/2015                       | <a href="http://www.arange-project.eu/">http://www.arange-project.eu/</a>           | Yes                                                                                  | NO                                            | NO                                                | Public                               |
| ASEC-DRYLAND-<br>FORESTS | Avoiding the socio-<br>ecological collapse of<br>remnant evergreen forests<br>in drylands: the case study<br>of northern Kenya | NA                                 | NA                               | NF                                                                                  | NA                                                                                   | NO                                            | NO                                                | Public                               |
| ATEAM                    | Advanced terrestrial<br>ecosystem analysis and<br>modelling                                                                    | 01/01/2001                         | 30/06/2004                       | <a href="https://www.pik-potsdam.de/ateam/">https://www.pik-potsdam.de/ateam/</a>   | Yes                                                                                  | NO                                            | NO                                                | Public                               |

Table S11. Cont.

| Project Acronym | Full Project Title                                                                                                                                                              | Start Date<br>(NA = Not Available) | End Date<br>(NA = Not Available) | Web Page<br>(NF = Not Found)                                                                        | Linkage to Biodiversity<br>and Ecosystem Services<br>(Forest Ecosystems<br>Included) | Italy as Partner in the<br>Project Consortium | Italy as Coordinator of<br>the Project Consortium | Type of<br>Partnership<br>from Italy |
|-----------------|---------------------------------------------------------------------------------------------------------------------------------------------------------------------------------|------------------------------------|----------------------------------|-----------------------------------------------------------------------------------------------------|--------------------------------------------------------------------------------------|-----------------------------------------------|---------------------------------------------------|--------------------------------------|
| CARBOAFRICA     | Quantification, understanding and prediction of carbon cycle, and other GHG gases, in Sub-Saharan Africa                                                                        | 01/10/2006                         | 30/09/2009                       | <a href="http://www.carboafrika.net/index_en.asp">http://www.carboafrika.net/index_en.asp</a>       | Not specifically                                                                     | YES                                           | YES                                               | Public                               |
| CCTAME          | Climate change - terrestrial adaption and mitigation in Europe                                                                                                                  | 01/06/2008                         | 31/08/2011                       | <a href="http://www.cctame.eu/">http://www.cctame.eu/</a>                                           | Partially                                                                            | NO                                            | NO                                                | Public                               |
| CLIMSAVE        | Climate change integrated assessment methodology for cross-sectoral adaptation and vulnerability in Europe                                                                      | 01/01/2010                         | 31/10/2013                       | <a href="http://www.climsave.eu/climsave/index.html">http://www.climsave.eu/climsave/index.html</a> | Partially                                                                            | NO                                            | NO                                                | Public                               |
| COMDREEF        | Community disassembly rules and the erosion of ecosystem functions in fragmented landscapes                                                                                     | NA                                 | NA                               | NF                                                                                                  | NA                                                                                   | NO                                            | NO                                                | Public                               |
| CRUE            | Coordination de la Recherche sur la gestion des inondations financie dans l'Union Europeene (Coordination of research financed in the European Union on Flood risk management)' | 01/11/2004                         | 31/10/2009                       | NF                                                                                                  | NA                                                                                   | YES                                           | NO                                                | Public                               |
| DESURVEY        | A Surveillance System for Assessing and Monitoring of Desertification                                                                                                           | 11/03/2005                         | 10/10/2010                       | <a href="http://www.noveltis.com/desurvey/">http://www.noveltis.com/desurvey/</a>                   | Not specifically                                                                     | YES                                           | NO                                                | Public                               |
| DYVERSE         | Vegetation dynamics and ecosystem services provision in a fragmented landscape in response to global change                                                                     | 01/06/2011                         | 31/05/2014                       | NF                                                                                                  | NA                                                                                   | NO                                            | NO                                                | Public                               |

Table S11. Cont.

| Project Acronym     | Full Project Title                                                                                                                              | Start Date<br>(NA = Not Available) | End Date<br>(NA = Not Available) | Web Page<br>(NF = Not Found)                                                                                              | Linkage to Biodiversity<br>and Ecosystem Services<br>(Forest Ecosystems<br>Included) | Italy as Partner in the<br>Project Consortium | Italy as Coordinator of<br>the Project Consortium | Type of<br>Partnership<br>from Italy |
|---------------------|-------------------------------------------------------------------------------------------------------------------------------------------------|------------------------------------|----------------------------------|---------------------------------------------------------------------------------------------------------------------------|--------------------------------------------------------------------------------------|-----------------------------------------------|---------------------------------------------------|--------------------------------------|
| ECOADAPT            | Ecosystem-based strategies and innovations in water governance networks for adaptation to climate change in Latin American Landscapes           | 15/01/2012                         | 14/01/2016                       | <a href="https://sites.google.com/site/ecoadaptprojectenglish/">https://sites.google.com/site/ecoadaptprojectenglish/</a> | Not specifically                                                                     | NO                                            | NO                                                | Public                               |
| ECOOP               | European COastal-shelf sea Operational observing and forecasting system                                                                         | 01/02/2007                         | 30/04/2010                       | <a href="http://www.ecoop.eu/">http://www.ecoop.eu/</a>                                                                   | Not specifically                                                                     | YES                                           | NO                                                | both                                 |
| EFORWOOD            | Tools for Sustainability Impact Assessment of the Forestry-Wood Chain                                                                           | 01/11/2005                         | 31/01/2010                       | <a href="http://www.innovawood.com/eforwood/">http://www.innovawood.com/eforwood/</a>                                     | Partially                                                                            | NO                                            | NO                                                | Public                               |
| EU-MEDIN COMPANIONS | Supporting publications on Natural Hazards Research                                                                                             | 01/07/2005                         | 30/11/2007                       | NF                                                                                                                        | NA                                                                                   | NO                                            | NO                                                | Public                               |
| FIRE PARADOX        | An innovative approach of Integrated Wildland Fire Management regulating the wildfire problem by the wise use of fire: solving the FIRE PARADOX | 01/03/2006                         | 28/02/2010                       | <a href="http://www.fireparadox.org/index.php">http://www.fireparadox.org/index.php</a>                                   | Not specifically                                                                     | YES                                           | NO                                                | Public                               |
| FIXSOIL             | Understanding how plant root traits and soil microbial processes influence soil erodibility                                                     | 01/05/2014                         | 30/04/2016                       | NF                                                                                                                        | NA                                                                                   | NO                                            | NO                                                | Public                               |
| FLAGSHIP            | European Framework for safe, efficient and environmentally-friendly ship operations                                                             | 01/01/2007                         | 31/05/2011                       | <a href="http://flagship-project.eu/">http://flagship-project.eu/</a>                                                     | Not specifically                                                                     | YES                                           | NO                                                | private                              |

Table S11. Cont.

| Project Acronym | Full Project Title                                                                                                                                                                    | Start Date<br>(NA = Not Available) | End Date<br>(NA = Not Available) | Web Page<br>(NF = Not Found) | Linkage to Biodiversity<br>and Ecosystem Services<br>(Forest Ecosystems<br>Included) | Italy as Partner in the<br>Project Consortium | Italy as Coordinator of<br>the Project Consortium | Type of<br>Partnership<br>from Italy |
|-----------------|---------------------------------------------------------------------------------------------------------------------------------------------------------------------------------------|------------------------------------|----------------------------------|------------------------------|--------------------------------------------------------------------------------------|-----------------------------------------------|---------------------------------------------------|--------------------------------------|
| FLUORFLIGHT     | FluorFLIGHT: A new integrated canopy fluorescence model based for remote sensing of forest health and productivity                                                                    | NA                                 | NA                               | NF                           | NA                                                                                   | NO                                            | NO                                                | Public                               |
| FORADAPT        | Decision support toolkit FOR ADAPTive management of forest ecosystem services across borders in the face of climate change and economic scarcity in Europe                            | 01/02/2015                         | 31/01/2017                       | NF                           | NA                                                                                   | NO                                            | NO                                                | Public                               |
| FORCONEPAL      | Forest Resource Conservation in Nepal                                                                                                                                                 | NA                                 | NA                               | NF                           | NA                                                                                   | NO                                            | NO                                                | Public                               |
| FORECOFUN-SSA   | Assessing climate change impacts over large areas of primary forests in southern South America                                                                                        | 01/03/2012                         | 28/02/2014                       | NF                           | NA                                                                                   | NO                                            | NO                                                | Public                               |
| FOREST REHAB    | Evaluation of new forestry practices in North America: does forest management rehabilitat and maintain important ecological processes and structures?                                 | 10/12/2005                         | 09/09/2007                       | NF                           | NA                                                                                   | NO                                            | NO                                                | Public                               |
| FORESTA         | FORest conservation and EcoSysTem Accounting. Towards the integration of private and public values into land use decisions modeling at farm scale. An application to Andalusia montes | 01/05/2014                         | 30/04/2016                       | NF                           | NA                                                                                   | NO                                            | NO                                                | Public                               |

Table S11. Cont.

| Project Acronym | Full Project Title                                                                                                                                                                             | Start Date<br>(NA = Not Available) | End Date<br>(NA = Not Available) | Web Page<br>(NF = Not Found)                                          | Linkage to Biodiversity<br>and Ecosystem Services<br>(Forest Ecosystems<br>Included) | Italy as Partner in the<br>Project Consortium | Italy as Coordinator of<br>the Project Consortium | Type of<br>Partnership<br>from Italy |
|-----------------|------------------------------------------------------------------------------------------------------------------------------------------------------------------------------------------------|------------------------------------|----------------------------------|-----------------------------------------------------------------------|--------------------------------------------------------------------------------------|-----------------------------------------------|---------------------------------------------------|--------------------------------------|
| FORESTERRA      | Enhancing FOREST REsearch in the<br>MediTERRanean through improved<br>coordination and integration                                                                                             | 01/01/2012                         | 31/12/2015                       | <a href="http://www.foresterra.eu/">http://www.foresterra.eu/</a>     | Not specifically                                                                     | YES                                           | NO                                                | Public                               |
| FORLIVE         | Forest management by small farmers<br>in the Amazon - an opportunity to<br>enhance forest ecosystem stability<br>and rural livelihood                                                          | 01/02/2005                         | 31/01/2009                       | NF                                                                    | NA                                                                                   | NO                                            | NO                                                | Public                               |
| FORMOD          | Forest Models for Sustainable<br>Forest Management                                                                                                                                             | 01/09/1999                         | 31/08/2002                       | NF                                                                    | NA                                                                                   | NO                                            | NO                                                | Public                               |
| FORTHREATS      | European Network on emerging<br>diseases and threats through invasive<br>alien species in forest ecosystems                                                                                    | 01/02/2007                         | 31/01/2009                       | NF                                                                    | NA                                                                                   | YES                                           | NO                                                | Public                               |
| FUNDIVEUROPE    | Functional significance of forest<br>biodiversity in Europe                                                                                                                                    | 01/10/2010                         | 31/03/2015                       | <a href="http://www.fundiveurope.eu/">http://www.fundiveurope.eu/</a> | Yes                                                                                  | YES                                           | NO                                                | Public                               |
| GEOLAND         | Geoland - GMES products & services,<br>integrating EO monitoring capacities,<br>to support the implementation of<br>European directives and policies<br>related to “land cover and vegetation” | 01/01/2004                         | 31/03/2007                       | <a href="http://www.geoland2.eu/">http://www.geoland2.eu/</a>         | Not specifically                                                                     | YES                                           | NO                                                | Public                               |

Table S11. Cont.

| Project Acronym   | Full Project Title                                                                                                                                             | Start Date<br>(NA = Not Available) | End Date<br>(NA = Not Available) | Web Page<br>(NF = Not Found)                                                                                                                                                                                                                                                                  | Linkage to Biodiversity<br>and Ecosystem Services<br>(Forest Ecosystems<br>Included) | Italy as Partner in the<br>Project Consortium | Italy as Coordinator of<br>the Project Consortium | Type of<br>Partnership<br>from Italy |
|-------------------|----------------------------------------------------------------------------------------------------------------------------------------------------------------|------------------------------------|----------------------------------|-----------------------------------------------------------------------------------------------------------------------------------------------------------------------------------------------------------------------------------------------------------------------------------------------|--------------------------------------------------------------------------------------|-----------------------------------------------|---------------------------------------------------|--------------------------------------|
| GLOCHAMORE        | Global Change in Mountain Regions:<br>An Integrated Assessment of Causes<br>and Consequences                                                                   | 01/11/2003                         | 31/10/2005                       | <a href="http://www.unesco.org/new/en/natural-sciences/environment/ecological-sciences/specific-ecosystems/mountains/glochamore/">http://www.unesco.org/<br/>new/en/natural-<br/>sciences/environment/e-<br/>cological-<br/>sciences/specific-<br/>ecosystems/mountains/g-<br/>lochamore/</a> | Partially                                                                            | YES                                           | NO                                                | Public                               |
| GNU               | GMES network of users                                                                                                                                          | 01/10/2007                         | 30/09/2010                       | <a href="http://www.fp7helm.eu/gnu/">http://www.fp7helm.eu/<br/>gnu/</a>                                                                                                                                                                                                                      | Not specifically                                                                     | YES                                           | NO                                                | Public                               |
| HERCULES          | Sustainable futures for Europe's<br>HERitage in CULTural landscapES:<br>Tools for understanding, managing,<br>and protecting landscape functions<br>and values | 01/12/2013                         | 30/11/2016                       | <a href="http://www.hercules-landscapes.eu/">http://www.hercules-<br/>landscapes.eu/</a>                                                                                                                                                                                                      | Not specifically                                                                     | NO                                            | NO                                                | Public                               |
| IMECC             | Infrastructure for Measurement of the<br>European Carbon Cycle                                                                                                 | 01/04/2007                         | 30/09/2011                       | <a href="http://imecc.ipsl.jussieu.fr/">http://imecc.ipsl.jussieu.<br/>fr/</a>                                                                                                                                                                                                                | Not specifically                                                                     | YES                                           | NO                                                | Public                               |
| INCA-CO2          | International Co-operation actions on<br>CO2 capture and storage                                                                                               | 01/10/2004                         | 29/02/2008                       | NF                                                                                                                                                                                                                                                                                            | NA                                                                                   | YES                                           | NO                                                | Public                               |
| INNOVAWOOD<br>SSA | An innovation strategy to integrate<br>industry needs and research capability<br>in the European forestry-wood chain                                           | 01/09/2005                         | 29/02/2008                       | <a href="http://www.innovawood.com/">http://www.innovawood<br/>.com/</a>                                                                                                                                                                                                                      | Not specifically                                                                     | YES                                           | NO                                                | Public                               |
| INTEGRAL          | Future-oriented integrated<br>management of European forest<br>landscapes                                                                                      | 01/11/2011                         | 31/10/2015                       | <a href="http://www.integral-project.eu/">http://www.integral-<br/>project.eu/</a>                                                                                                                                                                                                            | Yes                                                                                  | YES                                           | NO                                                | Public                               |

Table S11. Cont.

| Project Acronym | Full Project Title                                                                                            | Start Date<br>(NA = Not Available) | End Date<br>(NA = Not Available) | Web Page<br>(NF = Not Found)                                                                                                                                                                                                                | Linkage to Biodiversity<br>and Ecosystem Services<br>(Forest Ecosystems<br>Included) | Italy as Partner in the<br>Project Consortium | Italy as Coordinator of<br>the Project Consortium | Type of<br>Partnership<br>from Italy |
|-----------------|---------------------------------------------------------------------------------------------------------------|------------------------------------|----------------------------------|---------------------------------------------------------------------------------------------------------------------------------------------------------------------------------------------------------------------------------------------|--------------------------------------------------------------------------------------|-----------------------------------------------|---------------------------------------------------|--------------------------------------|
| LEDDRA          | Land and Ecosystem Degradation and<br>Desertification: Assessing the Fit of<br>Responses                      | 01/04/2010                         | 31/03/2014                       | <a href="http://leddra.aegean.gr/index.htm">http://leddra.aegean.gr/index.htm</a>                                                                                                                                                           | Partially                                                                            | YES                                           | NO                                                | Public                               |
| LINKTOFUN       | Linking tree and belowground<br>biodiversity to forest Ecosystem<br>function                                  | 01/03/2013                         | 28/02/2017                       | NF                                                                                                                                                                                                                                          | NA                                                                                   | NO                                            | NO                                                | Public                               |
| LITCOAST        | Management of coastal forests of<br>Lithuania: sustaining and enhancing<br>forest health through silviculture | 01/12/2006                         | 30/11/2010                       | <a href="http://www.slu.se/en/departments/forest-mycology-plantpathology/research/forest_pathology/litcoast/">http://www.slu.se/en/departments/forest-mycology-plantpathology/research/forest_pathology/litcoast/</a>                       | Partially                                                                            | NO                                            | NO                                                | Public                               |
| MEDIGRID        | Mediterranean Grid Of Multi-Risk<br>Data And Models                                                           | 01/11/2004                         | 31/10/2006                       | <a href="http://www.medigrid.de/index_en.html">http://www.medigrid.de/index_en.html</a>                                                                                                                                                     | Not specifically                                                                     | NO                                            | NO                                                | Public                               |
| MENFRI          | Mediterranean Network of Forestry<br>Research and Innovation (MENFRI)                                         | 01/12/2013                         | 30/11/2016                       | <a href="http://www.etrera2020.eu/r21-clusters/11-mediterranean-network-of-forestry-research-and-innovation-menfri.html">http://www.etrera2020.eu/r21-clusters/11-mediterranean-network-of-forestry-research-and-innovation-menfri.html</a> | Not specifically                                                                     | YES                                           | NO                                                | private                              |
| MYCOIND         | Mycorrhizas and Europe s oaks: a<br>functional biodiversity knowledge gap                                     | 23/08/2010                         | 22/08/2012                       | NF                                                                                                                                                                                                                                          | NA                                                                                   | NO                                            | NO                                                | Public                               |

Table S11. *Cont.*

| Project Acronym | Full Project Title                                                                                                                                               | Start Date<br>(NA = Not Available) | End Date<br>(NA = Not Available) | Web Page<br>(NF = Not Found)                                              | Linkage to Biodiversity<br>and Ecosystem Services<br>(Forest Ecosystems<br>Included) | Italy as Partner in the<br>Project Consortium | Italy as Coordinator of<br>the Project Consortium | Type of<br>Partnership<br>from Italy |
|-----------------|------------------------------------------------------------------------------------------------------------------------------------------------------------------|------------------------------------|----------------------------------|---------------------------------------------------------------------------|--------------------------------------------------------------------------------------|-----------------------------------------------|---------------------------------------------------|--------------------------------------|
| NA              | Biological criteria for sustained development in natural degenerate forests of mediterranean Europe                                                              | 01/03/1991                         | 31/08/1993                       | NF                                                                        | NA                                                                                   | NO                                            | NO                                                | Public                               |
| NA              | Early response areas for climate change in Eurasia - Spatio-temporal dynamics of upper tree line in the Ural Mountains and implications for carbon sequestration | 01/05/2002                         | 30/04/2005                       | NF                                                                        | NA                                                                                   | NO                                            | NO                                                | Public                               |
| NORTH STATE     | Enabling Intelligent GMES Services for Carbon and Water Balance Modeling of Northern Forest Ecosystems                                                           | NA                                 | NA                               | <a href="http://www.northstatefp7.eu/">http://www.northstatefp7.eu/</a>   | Partially                                                                            | NO                                            | NO                                                | Public                               |
| OPERAS          | Operational Potential of Ecosystem Research Applications                                                                                                         | 01/12/2012                         | 30/11/2017                       | <a href="http://www.operas-project.eu/">http://www.operas-project.eu/</a> | Yes                                                                                  | NO                                            | NO                                                | Public                               |
| ORCHESTRA       | Open architecture and spatial data infrastructure for risk management                                                                                            | 01/09/2004                         | 29/02/2008                       | <a href="http://www.eu-orchestra.org/">http://www.eu-orchestra.org/</a>   | Not specifically                                                                     | NO                                            | NO                                                | Public                               |
| PALMS           | Palm harvest impacts in tropical forests                                                                                                                         | 01/01/2009                         | 31/12/2013                       | <a href="http://www.fp7-palms.org/">http://www.fp7-palms.org/</a>         | Not specifically                                                                     | NO                                            | NO                                                | Public                               |
| PASTFORWARD     | Development trajectories of temperate forest plant communities under global change: combining hindsight and forecasting (PASTFORWARD)                            | 01/06/2014                         | 31/05/2019                       | NF                                                                        | NA                                                                                   | NO                                            | NO                                                | Public                               |



Table S11. Cont.

| Project Acronym | Full Project Title                                                                                                                            | Start Date<br>(NA = Not Available) | End Date<br>(NA = Not Available) | Web Page<br>(NF = Not Found)                                                                                                              | Linkage to Biodiversity<br>and Ecosystem Services<br>(Forest Ecosystems<br>Included) | Italy as Partner in the<br>Project Consortium | Italy as Coordinator of<br>the Project Consortium | Type of<br>Partnership<br>from Italy |
|-----------------|-----------------------------------------------------------------------------------------------------------------------------------------------|------------------------------------|----------------------------------|-------------------------------------------------------------------------------------------------------------------------------------------|--------------------------------------------------------------------------------------|-----------------------------------------------|---------------------------------------------------|--------------------------------------|
| POPFACE         | Effects of atmospheric carbon enrichment of cultivated terrestrial ecosystems: a face experiment on short rotation intensive polar plantation | 01/05/1998                         | 31/10/2001                       | NF                                                                                                                                        | NA                                                                                   | YES                                           | YES                                               | Public                               |
| PORT CHECK      | Development of generic 'on site' molecular diagnostics for eu quarantine pests and pathogens'                                                 | 01/03/2004                         | 31/08/2007                       | NF                                                                                                                                        | NA                                                                                   | NO                                            | NO                                                | Public                               |
| PREFER          | Space-based Information Support for Prevention and REcovery of Forest Fires Emergency in the MediteRanean Area                                | 01/12/2012                         | 30/11/2015                       | <a href="http://www.prefer-copernicus.eu/index.php/project-description">http://www.prefer-copernicus.eu/index.php/project-description</a> | Not specifically                                                                     | NO                                            | NO                                                | Public                               |
| PROFOR          | Protected Forest Areas                                                                                                                        | 28/03/2001                         | 28/02/2006                       | NF                                                                                                                                        | NA                                                                                   | NA                                            | NA                                                | Public                               |
| PUMPSEA         | Peri-urban mangroves forests as filters and potential phytoremediators of domestic sewage in East Africa                                      | 01/02/2005                         | 31/07/2008                       | <a href="http://www.pumpsea.ica.t.fc.ul.pt/main.php">http://www.pumpsea.ica.t.fc.ul.pt/main.php</a>                                       | Not specifically                                                                     | YES                                           | NO                                                | Public                               |
| RAPRA           | Risk analysis for Phytophthora ramorum, a newly recognised pathogen threat to Europe and the cause of Sudden Oak Death in the USA             | 01/01/2004                         | 31/03/2007                       | <a href="http://rapra.fera.defra.gov.uk/">http://rapra.fera.defra.gov.uk/</a>                                                             | Not specifically                                                                     | NO                                            | NO                                                | Public                               |

Table S11. *Cont.*

| Project Acronym | Full Project Title                                                                                                                       | Start Date<br>(NA = Not Available) | End Date<br>(NA = Not Available) | Web Page<br>(NF = Not Found)                                                                        | Linkage to Biodiversity<br>and Ecosystem Services<br>(Forest Ecosystems<br>Included) | Italy as Partner in the<br>Project Consortium | Italy as Coordinator of<br>the Project Consortium | Type of<br>Partnership<br>from Italy |
|-----------------|------------------------------------------------------------------------------------------------------------------------------------------|------------------------------------|----------------------------------|-----------------------------------------------------------------------------------------------------|--------------------------------------------------------------------------------------|-----------------------------------------------|---------------------------------------------------|--------------------------------------|
| REAL            | Resilience in East African<br>Landscapes: Identifying critical<br>thresholds and sustainable trajectories<br>– past, present and future  | 01/09/2013                         | 31/08/2017                       | <a href="http://www.real-project.eu/">http://www.real-project.eu/</a>                               | Partially                                                                            | NO                                            | NO                                                | Public                               |
| RESTORE         | Resilience and stability in developing<br>tools for sustainable forest<br>management and restoration                                     | 01/03/2009                         | 28/02/2011                       | NF                                                                                                  | NA                                                                                   | NO                                            | NO                                                | Public                               |
| RISK-BASE       | Coordination Action on Risk Based<br>Management of River Basins                                                                          | 01/09/2006                         | 31/12/2009                       | NF                                                                                                  | NA                                                                                   | NO                                            | NO                                                | Public                               |
| ROBIN           | Role Of Biodiversity In climate<br>change mitigationN                                                                                    | 01/11/2011                         | 31/10/2015                       | <a href="http://robinproject.info/home/">http://robinproject.info/home/</a>                         | Yes                                                                                  | NO                                            | NO                                                | Public                               |
| SAGE            | Simulating adaptation of forest<br>management to changing climate and<br>disturbance regimes                                             | 01/04/2013                         | 30/09/2016                       | NF                                                                                                  | NA                                                                                   | NO                                            | NO                                                | Public                               |
| SUMFOREST       | Tackling the challenges in sustainable<br>and multifunctional forestry through<br>enhanced research coordination for<br>policy decisions | 01/01/2014                         | 31/12/2017                       | <a href="http://era-platform.eu/era-nets/sumforest/">http://era-platform.eu/era-nets/sumforest/</a> | Partially                                                                            | YES                                           | NO                                                | Public                               |
| TEEMBIO         | Toward Eco-Evolutionary Models for<br>BIODiversity Scenarios                                                                             | 01/01/2012                         | 31/12/2016                       | NF                                                                                                  | NA                                                                                   | NO                                            | NO                                                | Public                               |
| TRANZFOR        | Transferring research between EU and<br>Australia-New Zealand on forestry<br>and climate change                                          | 01/02/2009                         | 30/06/2013                       | <a href="http://www.tranzfor.eu/">http://www.tranzfor.eu/</a>                                       | Not specifically                                                                     | NO                                            | NO                                                | Public                               |

Table S11. *Cont.*

| Project Acronym | Full Project Title                                                                 | Start Date<br>(NA = Not Available) | End Date<br>(NA = Not Available) | Web Page<br>(NF = Not Found) | Linkage to Biodiversity<br>and Ecosystem Services<br>(Forest Ecosystems<br>Included) | Italy as Partner in the<br>Project Consortium | Italy as Coordinator of<br>the Project Consortium | Type of<br>Partnership<br>from Italy |
|-----------------|------------------------------------------------------------------------------------|------------------------------------|----------------------------------|------------------------------|--------------------------------------------------------------------------------------|-----------------------------------------------|---------------------------------------------------|--------------------------------------|
| WARECALC        | Water resources vulnerability to<br>climate and anthropogenic landscape<br>changes | 15/04/2009                         | 14/04/2013                       | NF                           | NA                                                                                   | YES                                           | YES                                               | Public                               |
| WARM            | Wildland-urban area fire risk<br>management                                        | 01/12/2001                         | 31/05/2004                       | NF                           | NA                                                                                   | NO                                            | NO                                                | Public                               |

## Reference

- 1 Haines-Young, R.; Potschin, M. *2013 CICES V4.3—Revised report prepared following consultation on CICES Version 4, August–December 2012*; The University of Nottingham, Centre for Environmental Management: Nottingham, UK, 2013; p. 32.

© 2015 by the authors; licensee MDPI, Basel, Switzerland. This article is an open access article distributed under the terms and conditions of the Creative Commons Attribution license (<http://creativecommons.org/licenses/by/4.0/>).
